# Supplementary material
Source: Springer Nature journal article supplement (https://www.springermedizin.de/resource/supplementary/12882_2014_845_MOESM1_ESM.pdf/9454432)
Supplement: MOESM1 [file 9454432]

**Table S1 – Adverse Study Outcomes**

| <b>Outcome</b>                                                | <b>Definition</b>                                                                                                                                                                                                                                                                                                                                                                                                                                                                                                                                                                                                                                                                                                                                                | <b>Data Source</b>          |
|---------------------------------------------------------------|------------------------------------------------------------------------------------------------------------------------------------------------------------------------------------------------------------------------------------------------------------------------------------------------------------------------------------------------------------------------------------------------------------------------------------------------------------------------------------------------------------------------------------------------------------------------------------------------------------------------------------------------------------------------------------------------------------------------------------------------------------------|-----------------------------|
| <b>Primary Outcomes</b>                                       |                                                                                                                                                                                                                                                                                                                                                                                                                                                                                                                                                                                                                                                                                                                                                                  |                             |
| All-cause death                                               | Death as indicated in CMS file                                                                                                                                                                                                                                                                                                                                                                                                                                                                                                                                                                                                                                                                                                                                   | CMS death notification file |
| CVD death                                                     | Primary cause of death: 23,26, 28, 29,36                                                                                                                                                                                                                                                                                                                                                                                                                                                                                                                                                                                                                                                                                                                         | CMS death notification file |
| Infection-related death                                       | Primary cause of death: 33,34,45-48, 51,52,61-63,70                                                                                                                                                                                                                                                                                                                                                                                                                                                                                                                                                                                                                                                                                                              | CMS death notification file |
| Hospitalized for stroke                                       | Any ICD-9-CM diagnostic code of 435.xx, 436.xx, 433.x1, 434.x1, 437.1x, 437.9x                                                                                                                                                                                                                                                                                                                                                                                                                                                                                                                                                                                                                                                                                   | CMS Part A claims           |
| Hospitalized for myocardial infarction                        | Primary ICD-9-CM code of 410.ss, hospital stay 3-180 days or died within 3 days                                                                                                                                                                                                                                                                                                                                                                                                                                                                                                                                                                                                                                                                                  | CMS Part A claims           |
| Hospitalized for pneumonia, sepsis, vascular access infection | Any ICD-9-CM diagnostic codes of 996.62 (vascular access), 481.xx (pneumonia), 038.xx (sepsis)                                                                                                                                                                                                                                                                                                                                                                                                                                                                                                                                                                                                                                                                   | CMS Part A claims           |
| Hospitalized for infection (all major organ systems)          | Any hospital admission with one of the following ICD-9-CM diagnostic codes as the principal diagnostic code: 001-139, 254.1, 320-326, 331.81, 372-372.39, 373.0-373.2, 382-382.4, 383.0, 386.33, 386.35, 388.60, 390-393, 421-421.1, 422.0, 422.91-422.93, 460-466, 472-474.0, 475-476.1, 478.21-478.24, 478.29, 480-490, 491.1, 494, 510-511, 513.0, 518.6, 519.01, 522.5, 522.7, 527.3, 528.3, 540-542, 566-567.9, 569.5, 572-572.1, 573.1-573.3, 575-575.12, 590-590.9, 595-595.4, 597-597.89, 598, 599.0, 601-601.9, 604-604.9, 607.1, 607.2, 608.0, 608.4, 611.0, 614-616.1, 616.3-616.4, 616.8, 670, 680-686.9, 706.0, 711-711.9, 730-730.3, 730.8-730.9, 790.7-790.8, 996.60-996.69, 997.62, 998.5, and 999.3.                                            | CMS Part A claims           |
| Use of IV antibiotics                                         | Any indication of the use of the following drugs: Amikin® (amikacin sulfate); ampicillin; Ancef®, Kefzol® (cefazolin); aztreonam; Cefizox® (ceftizoxime); Cefotan® (cefotetan); Fortaz®, Tazicef® (ceftazidime); Claforan® (cefotaxime); clindamycin; Cubicin® (daptomycin); ethambutol; gentamicin; Keflin® (cephalothin); Levaquin® (levofloxacin); Mefoxin® (cefoxitin); Merrem® (meropenem); nafcillin; Nebcin® (tobramycin); oxacillin; Penicillin G; Zosyn® (piperacillin and tazobactam); Primaxin® (imipenem and cilastatin); Rocephin® (ceftriaxone); streptomycin; Timentin® (ticarcillin and clavulanate potassium); Unasyn® (ampicillin and sulbactam); Vancocin® (vancomycin); Vibramycin® (doxycycline); Zinacef® (cefuroxime); Zyvox® (linezolid) | Clinical Database           |

**Table S2 – Definition of Covariates**

| COVARIATE                               | DEFINITION                                                                                                                                                                                                                                                                                                                                                                                                                                                                                                                                                                                                                                                                                                                                                                                                                                                                                                                                                                                                                                                                                                                                                                                                                                                                                                                                                                                                                                                                                                                         | SOURCE                                                                                                     |
|-----------------------------------------|------------------------------------------------------------------------------------------------------------------------------------------------------------------------------------------------------------------------------------------------------------------------------------------------------------------------------------------------------------------------------------------------------------------------------------------------------------------------------------------------------------------------------------------------------------------------------------------------------------------------------------------------------------------------------------------------------------------------------------------------------------------------------------------------------------------------------------------------------------------------------------------------------------------------------------------------------------------------------------------------------------------------------------------------------------------------------------------------------------------------------------------------------------------------------------------------------------------------------------------------------------------------------------------------------------------------------------------------------------------------------------------------------------------------------------------------------------------------------------------------------------------------------------|------------------------------------------------------------------------------------------------------------|
| <b>Demographic</b>                      |                                                                                                                                                                                                                                                                                                                                                                                                                                                                                                                                                                                                                                                                                                                                                                                                                                                                                                                                                                                                                                                                                                                                                                                                                                                                                                                                                                                                                                                                                                                                    |                                                                                                            |
| Age                                     | Categorized as: 16-45; 46-60; 61-75; >75 yrs.                                                                                                                                                                                                                                                                                                                                                                                                                                                                                                                                                                                                                                                                                                                                                                                                                                                                                                                                                                                                                                                                                                                                                                                                                                                                                                                                                                                                                                                                                      | USRDS                                                                                                      |
| Sex                                     | Male or female                                                                                                                                                                                                                                                                                                                                                                                                                                                                                                                                                                                                                                                                                                                                                                                                                                                                                                                                                                                                                                                                                                                                                                                                                                                                                                                                                                                                                                                                                                                     | USRDS                                                                                                      |
| Race                                    | White, Black, Other                                                                                                                                                                                                                                                                                                                                                                                                                                                                                                                                                                                                                                                                                                                                                                                                                                                                                                                                                                                                                                                                                                                                                                                                                                                                                                                                                                                                                                                                                                                | USRDS                                                                                                      |
| <b>Clinical</b>                         |                                                                                                                                                                                                                                                                                                                                                                                                                                                                                                                                                                                                                                                                                                                                                                                                                                                                                                                                                                                                                                                                                                                                                                                                                                                                                                                                                                                                                                                                                                                                    |                                                                                                            |
| Vintage                                 | Categorized as 0; 1-3; 4 or more yrs.                                                                                                                                                                                                                                                                                                                                                                                                                                                                                                                                                                                                                                                                                                                                                                                                                                                                                                                                                                                                                                                                                                                                                                                                                                                                                                                                                                                                                                                                                              | USRDS                                                                                                      |
| BMI                                     | Categorized as underweight, normal, overweight, obese                                                                                                                                                                                                                                                                                                                                                                                                                                                                                                                                                                                                                                                                                                                                                                                                                                                                                                                                                                                                                                                                                                                                                                                                                                                                                                                                                                                                                                                                              | Clinical Database & USRDS                                                                                  |
| <b>Anemia Management</b>                |                                                                                                                                                                                                                                                                                                                                                                                                                                                                                                                                                                                                                                                                                                                                                                                                                                                                                                                                                                                                                                                                                                                                                                                                                                                                                                                                                                                                                                                                                                                                    |                                                                                                            |
| Access                                  | Most recent vascular access (catheter vs fistula/graft) prior to TSAT index date                                                                                                                                                                                                                                                                                                                                                                                                                                                                                                                                                                                                                                                                                                                                                                                                                                                                                                                                                                                                                                                                                                                                                                                                                                                                                                                                                                                                                                                   | Clinical Database                                                                                          |
| EPO dose (baseline)                     | Total EPO dose, (quintiles)                                                                                                                                                                                                                                                                                                                                                                                                                                                                                                                                                                                                                                                                                                                                                                                                                                                                                                                                                                                                                                                                                                                                                                                                                                                                                                                                                                                                                                                                                                        | Clinical Database                                                                                          |
| EPO dose (exposure)                     | Total EPO dose, (tertiles plus a no-use category)                                                                                                                                                                                                                                                                                                                                                                                                                                                                                                                                                                                                                                                                                                                                                                                                                                                                                                                                                                                                                                                                                                                                                                                                                                                                                                                                                                                                                                                                                  | Clinical Database                                                                                          |
| Index TSAT                              | Last TSAT at baseline (quintiles)                                                                                                                                                                                                                                                                                                                                                                                                                                                                                                                                                                                                                                                                                                                                                                                                                                                                                                                                                                                                                                                                                                                                                                                                                                                                                                                                                                                                                                                                                                  | Clinical Database                                                                                          |
| Iron dose                               | Total dose at last month of baseline, categorized as none, low (1-200 mg), or high (>200mg)                                                                                                                                                                                                                                                                                                                                                                                                                                                                                                                                                                                                                                                                                                                                                                                                                                                                                                                                                                                                                                                                                                                                                                                                                                                                                                                                                                                                                                        | Clinical Database                                                                                          |
| Hemoglobin                              | Most proximal Hb lab prior to index TSAT date (<10,10-11,>11-12,>12-13,>13)                                                                                                                                                                                                                                                                                                                                                                                                                                                                                                                                                                                                                                                                                                                                                                                                                                                                                                                                                                                                                                                                                                                                                                                                                                                                                                                                                                                                                                                        | Clinical Database                                                                                          |
| Ferritin                                | Most proximal serum ferritin prior to index TSAT date (quintiles)                                                                                                                                                                                                                                                                                                                                                                                                                                                                                                                                                                                                                                                                                                                                                                                                                                                                                                                                                                                                                                                                                                                                                                                                                                                                                                                                                                                                                                                                  | Clinical Database                                                                                          |
| Albumin                                 | At baseline (<3.3, 3.3-3.9, >3.9)                                                                                                                                                                                                                                                                                                                                                                                                                                                                                                                                                                                                                                                                                                                                                                                                                                                                                                                                                                                                                                                                                                                                                                                                                                                                                                                                                                                                                                                                                                  | Clinical Database                                                                                          |
| <b>Comorbidities</b>                    |                                                                                                                                                                                                                                                                                                                                                                                                                                                                                                                                                                                                                                                                                                                                                                                                                                                                                                                                                                                                                                                                                                                                                                                                                                                                                                                                                                                                                                                                                                                                    |                                                                                                            |
| Hospital days in last month of baseline | Categorized as 0, 1-3, <=4                                                                                                                                                                                                                                                                                                                                                                                                                                                                                                                                                                                                                                                                                                                                                                                                                                                                                                                                                                                                                                                                                                                                                                                                                                                                                                                                                                                                                                                                                                         | USRDS, Medicare Part A Claims                                                                              |
| Infection in last month                 | <p>Any hospital admission in the last month with one of the following ICD-9-CM diagnostic codes as the principal diagnostic code: 001-139, 254.1, 320-326, 331.81, 372-372.39, 373.0-373.2, 382-382.4, 383.0, 386.33, 386.35, 388.60, 390-393, 421-421.1, 422.0, 422.91-422.93, 460-466, 472-474.0, 475-476.1, 478.21-478.24, 478.29, 480-490, 491.1, 494, 510-511, 513.0, 518.6, 519.01, 522.5, 522.7, 527.3, 528.3, 540-542, 566-567.9, 569.5, 572-572.1, 573.1-573.3, 575-575.12, 590-590.9, 595-595.4, 597-597.89, 598, 599.0, 601-601.9, 604-604.9, 607.1, 607.2, 608.0, 608.4, 611.0, 614-616.1, 616.3-616.4, 616.8, 670, 680-686.9, 706.0, 711-711.9, 730-730.3, 730.8-730.9, 790.7-790.8, 996.60-996.69, 997.62, 998.5, and 999.3.</p> <p>Any claims with the following HCPCS codes for antibiotic use in last month of baseline: J3370, J0690, J0713, J0692, J0696, J1580, J3260, J0278, J1840, J1956.</p> <p>Any indication of the use of the following drugs: Amikin® (amikacin sulfate); ampicillin; Ancef®, Kefzol® (cefazolin); aztreonam; Cefizox® (ceftizoxime); Cefotan® (cefotetan); Fortaz®, Tazicef® (ceftazidime); Claforan® (cefotaxime); clindamycin; Cubicin® (daptomycin); ethambutol; gentamicin; Keflin® (cephalothin); Levaquin® (levofloxacin); Mefoxin® (cefoxitin); Merrem® (meropenem); nafcillin; Nebcin® (tobramycin); oxacillin; Penicillin G; Zosyn® (piperacillin and tazobactam); Primaxin® (imipenem and cilastatin); Rocephin® (ceftriaxone); streptomycin; Timentin® (ticarcillin and</p> | <p>USRDS, Medicare Part A Claims</p> <p>USRDS, Medicare Part A &amp; B Claims</p> <p>Clinical Database</p> |

|                                                                                                        |                                                                                                                                                                                                                                                                                                                                                               |                                   |
|--------------------------------------------------------------------------------------------------------|---------------------------------------------------------------------------------------------------------------------------------------------------------------------------------------------------------------------------------------------------------------------------------------------------------------------------------------------------------------|-----------------------------------|
|                                                                                                        | clavulanate potassium); Unasyn® (ampicillin and sulbactam); Vancocin® (vancomycin); Vibramycin® (doxycycline); Zinacef® (cefuroxime); Zyvox® (linezolid)                                                                                                                                                                                                      |                                   |
| Pneumonia                                                                                              | Any ICD-9-CM diagnostic code of 481.xx – 486.xx in baseline period                                                                                                                                                                                                                                                                                            | USRDS, Medicare Part A & B Claims |
| Vascular Access Infection                                                                              | Any ICD-9-CM diagnostic code of 996.62 in baseline period                                                                                                                                                                                                                                                                                                     |                                   |
| Sepsis                                                                                                 | Any ICD diagnostic code 038.xx, 995.90, 995.91, 995.92 in baseline period                                                                                                                                                                                                                                                                                     |                                   |
| Diabetes                                                                                               | Any ICD-9-CM diagnostic code of 250.xx in baseline period                                                                                                                                                                                                                                                                                                     |                                   |
| Ischemic stroke                                                                                        | Any ICD-9-CM diagnostic code of 434.01, 434.11, 434.91, 435, 436, 437, 438, V12.54 in baseline period                                                                                                                                                                                                                                                         |                                   |
| Myocardial infarction                                                                                  | Any ICD-9-CM diagnostic code of 410.xx in baseline period                                                                                                                                                                                                                                                                                                     |                                   |
| COPD                                                                                                   | Any ICD-9-CM diagnostic code of 490.xx-496.xx, 505.xx, 506.4 in baseline period                                                                                                                                                                                                                                                                               |                                   |
| Cancer                                                                                                 | Any ICD-9-CM diagnostic code of 173.3, 173.9, 174.0-175.9, 179-195, 196-199, 232.9, 233.0, 233.1, 300.29, 338.3, 789.51, 795.82, 799.4, V67.2, 200, 201, 202.0-202.3, 202.50-203.01, 203.8, 238.6, 273.3 in baseline period                                                                                                                                   |                                   |
| Gastrointestinal bleeding                                                                              | Any ICD-9-CM diagnostic code of 578.xx in baseline period                                                                                                                                                                                                                                                                                                     |                                   |
| <b>Additional Comorbidities for Sensitivity Analyses</b>                                               |                                                                                                                                                                                                                                                                                                                                                               |                                   |
| Medicaid Eligibility                                                                                   | Indicator for dual eligibility during any part of the baseline                                                                                                                                                                                                                                                                                                | USRDS, Enrollment File            |
| Year of treatment                                                                                      | 2006, 2007, 2008, 2009, 2010                                                                                                                                                                                                                                                                                                                                  | Clinical Database                 |
| Census Region                                                                                          | Based on location of last dialysis center in baseline period: Northeast, South, Midwest, West                                                                                                                                                                                                                                                                 | USRDS, Enrollment File            |
| ESRD Reason                                                                                            | Diabetes, Glomerulonephritis, hypertension, other                                                                                                                                                                                                                                                                                                             | USRDS, Medical Evidence Form      |
| Pulmonary circulation disease                                                                          | Any ICD-9-CM diagnostic code of 415.xx-417.xx in baseline period                                                                                                                                                                                                                                                                                              | USRDS, Medicare Part A & B Claims |
| Peptic Ulcer Disease                                                                                   | Any ICD-9-CM diagnostic code of 530.2, 531.xx-534.xx, V12.71 in baseline period                                                                                                                                                                                                                                                                               |                                   |
| Liver disease                                                                                          | Any ICD-9-CM diagnostic code of 070.32, 070.33, 070.54, 456.0, 456.1, 456.20, 456.21, 571.0, 571.2, 571.3, 571.4, 571.5, 571.6, 571.8, 571.9, 572.3, 572.8, V42.7 in baseline period                                                                                                                                                                          |                                   |
| Other neurological problem                                                                             | Any ICD-9-CM diagnostic code 331.9, 332.0, 333.4, 333.5, 334-335, 340, 341, 345.0, 345.1, 345.4, 345.5, 345.8, 345.9, 348.1, 348.3, 780.3, 784.3 in baseline period                                                                                                                                                                                           |                                   |
| Substance abuse                                                                                        | Any ICD-9-CM diagnostic code 303.xx-305.xx in baseline period                                                                                                                                                                                                                                                                                                 |                                   |
| Ischemic Heart disease, other heart disease, peripheral vascular disease, history of CABG, Stent, PTCA | Any ICD-9-CM diagnostic code of 411.xx-414.xx, 420.xx-429.xx, 785.o, V45.0, v53.3, 402.11, 402.91, 404.11, 404.12, 404.91, 404.93, 093.2, 746.3-746.6, v42.2, v43.3, v43.4441.xx-443.xx, 447.1, 557.1, 557.9, 444.xx-445.xx; Procedure codes (both ICD-9-CM and CPT) of 00.66, 92982, 92985, 36.06, 36.07, 92980, 33510-33514, 33516-33519 in baseline period |                                   |
| Hypertension                                                                                           | Any ICD-9-CM diagnostic code of 401.xx-405.xx, except 402.11, 402.91, 404.11, 404.13, 404.91, 404.93 in baseline period                                                                                                                                                                                                                                       |                                   |
| Rheumatic heart disease                                                                                | Any ICD-9-CM diagnostic code of 393.xx -398.xx in baseline period                                                                                                                                                                                                                                                                                             |                                   |
| Psychiatric problems                                                                                   | Any ICD-9-CM diagnostic code 295.xx-298.xx in baseline period                                                                                                                                                                                                                                                                                                 |                                   |
| Autoimmune disorders                                                                                   | Any ICD-9-CM diagnostic code of 564.1, 696.0, 696.1, 695.4,                                                                                                                                                                                                                                                                                                   |                                   |

|                   |                                                                                                                                                                                               |  |
|-------------------|-----------------------------------------------------------------------------------------------------------------------------------------------------------------------------------------------|--|
|                   | 710.0, 701.0, 710, 714, 720, 725 in baseline period                                                                                                                                           |  |
| Blood loss anemia | Any ICD-9-CM diagnostic code of 280.0 in baseline period                                                                                                                                      |  |
| Transfusion       | Indicator for receipt of one or more transfusions during the baseline period, based on HCPCS codes P9010, P9011, P9016, P9021, P9022, P9038, P9039, P9040, 36430 and ICD-9 codes 99.03, 99.04 |  |

**Table S3 – Unadjusted and Multivariable Adjusted Associations<sup>1</sup> Between Bolus versus Maintenance Dosing and Adverse Outcomes for Various Study Designs**

| Design                 | Model      | All Cause Death      | Hospitalized pneumonia, vascular access infection (VAI), sepsis | Intravenous Antibiotics | Infection of any major organ system | Infection-related Death | Hospitalized pneumonia, (VAI), sepsis or infection death | Any infection or intravenous antibiotic use | Cardiovascular disease (CVD) death | Hospitalized Myocardial Infarction (MI) | Hospitalized Stroke  | MI, Stroke or CVD death |
|------------------------|------------|----------------------|-----------------------------------------------------------------|-------------------------|-------------------------------------|-------------------------|----------------------------------------------------------|---------------------------------------------|------------------------------------|-----------------------------------------|----------------------|-------------------------|
| <b>1 month/3 month</b> | Unadjusted | 1.26<br>(1.11, 1.44) | 1.41<br>(1.26, 1.58)                                            | 1.32<br>(1.23, 1.41)    | 1.43<br>(1.31, 1.56)                | 1.55<br>(1.09, 2.21)    | 1.42<br>(1.27, 1.58)                                     | 1.31<br>(1.24, 1.39)                        | 1.08<br>(0.88, 1.34)               | 1.10<br>(0.83, 1.48)                    | 1.24<br>(0.92, 1.66) | 1.14<br>(0.99, 1.33)    |
|                        | Adjusted   | 0.92<br>(0.79, 1.06) | 1.08<br>(0.96, 1.21)                                            | 1.09<br>(1.01, 1.17)    | 1.13<br>(1.03, 1.24)                | 1.17<br>(0.80, 1.71)    | 1.08<br>(0.96, 1.21)                                     | 1.08<br>(1.02, 1.15)                        | 0.82<br>(0.66, 1.02)               | 0.95<br>(0.69, 1.32)                    | 1.07<br>(0.77, 1.47) | 0.92<br>(0.78, 1.09)    |
| <b>1 month/6 weeks</b> | Unadjusted | 1.42<br>(1.17, 1.73) | 1.48<br>(1.27, 1.74)                                            | 1.31<br>(1.20, 1.43)    | 1.43<br>(1.27, 1.61)                | 1.63<br>(0.90, 2.95)    | 1.48<br>(1.27, 1.73)                                     | 1.33<br>(1.24, 1.42)                        | 1.31<br>(0.98, 1.74)               | 1.09<br>(0.72, 1.63)                    | 1.12<br>(0.73, 1.73) | 1.21<br>(0.98, 1.49)    |
|                        | Adjusted   | 1.01<br>(0.81, 1.25) | 1.09<br>(0.92, 1.28)                                            | 1.05<br>(0.96, 1.15)    | 1.11<br>(0.98, 1.26)                | 1.25<br>(0.65, 2.39)    | 1.09<br>(0.92, 1.28)                                     | 1.07<br>(1.00, 1.15)                        | 1.01<br>(0.75, 1.36)               | 1.02<br>(0.65, 1.58)                    | 1.00<br>(0.62, 1.61) | 1.01<br>(0.80, 1.27)    |
| <b>1 week/6 weeks</b>  | Unadjusted | 1.42<br>(1.12, 1.81) | 1.73<br>(1.47, 2.05)                                            | 1.33<br>(1.20, 1.47)    | 1.58<br>(1.38, 1.80)                | 1.74<br>(0.91, 3.31)    | 1.72<br>(1.46, 2.03)                                     | 1.39<br>(1.28, 1.51)                        | 1.07<br>(0.74, 1.54)               | 1.13<br>(0.71, 1.81)                    | 0.89<br>(0.51, 1.52) | 1.06<br>(0.81, 1.37)    |
|                        | Adjusted   | 0.99<br>(0.77, 1.27) | 1.21<br>(1.01, 1.45)                                            | 1.01<br>(0.90, 1.12)    | 1.14<br>(0.99, 1.31)                | 0.99<br>(0.50, 1.95)    | 1.20<br>(1.01, 1.44)                                     | 1.06<br>(0.98, 1.16)                        | 0.80<br>(0.55, 1.17)               | 0.93<br>(0.56, 1.54)                    | 0.65<br>(0.37, 1.13) | 0.81<br>(0.61, 1.06)    |
| <b>2 weeks/6 weeks</b> | Unadjusted | 1.30<br>(1.05, 1.60) | 1.75<br>(1.50, 2.04)                                            | 1.27<br>(1.15, 1.39)    | 1.57<br>(1.40, 1.77)                | 1.78<br>(1.04, 3.06)    | 1.75<br>(1.51, 2.04)                                     | 1.34<br>(1.25, 1.44)                        | 1.07<br>(0.78, 1.49)               | 1.25<br>(0.85, 1.85)                    | 1.15<br>(0.73, 1.81) | 1.16<br>(0.93, 1.45)    |
|                        | Adjusted   | 0.96<br>(0.77, 1.20) | 1.21<br>(1.03, 1.43)                                            | 0.99<br>(0.90, 1.10)    | 1.16<br>(1.03, 1.31)                | 1.19<br>(0.66, 2.13)    | 1.21<br>(1.03, 1.43)                                     | 1.05<br>(0.97, 1.13)                        | 0.83<br>(0.59, 1.15)               | 1.04<br>(0.68, 1.59)                    | 0.98<br>(0.61, 1.57) | 0.94<br>(0.74, 1.18)    |

<sup>1</sup> hazard ratios

**Table S4 – Sensitivity Analyses of Hazard Ratios to the Inclusion of Additional Covariates**

| Design                  | Model    | All Cause Death      | Hospitalized pneumonia, vascular access infection (VAI), sepsis | Intravenous Antibiotics | Infection of any major organ system | Infection-related Death | Hospitalized pneumonia, (VAI), sepsis or infection death | Any infection or intravenous antibiotic use | Cardiovascular disease (CVD) death | Hospitalized Myocardial Infarction (MI) | Hospitalized Stroke  | MI, Stroke or CVD death |
|-------------------------|----------|----------------------|-----------------------------------------------------------------|-------------------------|-------------------------------------|-------------------------|----------------------------------------------------------|---------------------------------------------|------------------------------------|-----------------------------------------|----------------------|-------------------------|
| <b>1 month/ 3 month</b> | Primary  | 0.92<br>(0.79, 1.06) | 1.08<br>(0.96, 1.21)                                            | 1.09<br>(1.01, 1.17)    | 1.13<br>(1.03, 1.24)                | 1.17<br>(0.80, 1.71)    | 1.08<br>(0.96, 1.21)                                     | 1.08<br>(1.02, 1.15)                        | 0.82<br>(0.66, 1.02)               | 0.95<br>(0.69, 1.32)                    | 1.07<br>(0.77, 1.47) | 0.92<br>(0.78, 1.09)    |
|                         | Extended | 0.90<br>(0.77, 1.04) | 1.07<br>(0.95, 1.21)                                            | 1.09<br>(1.02, 1.18)    | 1.12<br>(1.02, 1.23)                | 1.18<br>(0.80, 1.76)    | 1.08<br>(0.96, 1.22)                                     | 1.07<br>(1.01, 1.14)                        | 0.83<br>(0.66, 1.04)               | 0.98<br>(0.71, 1.37)                    | 1.04<br>(0.75, 1.45) | 0.94<br>(0.79, 1.10)    |
| <b>1 month/ 6 weeks</b> | Primary  | 1.01<br>(0.81, 1.25) | 1.09<br>(0.92, 1.28)                                            | 1.05<br>(0.96, 1.15)    | 1.11<br>(0.98, 1.26)                | 1.25<br>(0.65, 2.39)    | 1.09<br>(0.92, 1.28)                                     | 1.07<br>(1.00, 1.15)                        | 1.01<br>(0.75, 1.36)               | 1.02<br>(0.65, 1.58)                    | 1.00<br>(0.62, 1.61) | 1.01<br>(0.80, 1.27)    |
|                         | Extended | 1.01<br>(0.81, 1.25) | 1.06<br>(0.90, 1.26)                                            | 1.05<br>(0.96, 1.15)    | 1.09<br>(0.96, 1.24)                | 1.31<br>(0.66, 2.58)    | 1.07<br>(0.90, 1.26)                                     | 1.06<br>(0.99, 1.14)                        | 1.04<br>(0.77, 1.41)               | 1.04<br>(0.67, 1.62)                    | 1.03<br>(0.63, 1.69) | 1.04<br>(0.83, 1.32)    |
| <b>1 week/ 6 weeks</b>  | Primary  | 0.99<br>(0.77, 1.27) | 1.21<br>(1.01, 1.45)                                            | 1.01<br>(0.90, 1.12)    | 1.14<br>(0.99, 1.31)                | 0.99<br>(0.50, 1.95)    | 1.20<br>(1.01, 1.44)                                     | 1.06<br>(0.98, 1.16)                        | 0.80<br>(0.55, 1.17)               | 0.93<br>(0.56, 1.54)                    | 0.65<br>(0.37, 1.13) | 0.81<br>(0.61, 1.06)    |
|                         | Extended | 0.97<br>(0.75, 1.26) | 1.20<br>(1.00, 1.44)                                            | 1.00<br>(0.89, 1.11)    | 1.09<br>(0.95, 1.26)                | 1.03<br>(0.52, 2.06)    | 1.19<br>(1.00, 1.43)                                     | 1.02<br>(0.93, 1.11)                        | 0.85<br>(0.58, 1.25)               | 0.96<br>(0.57, 1.61)                    | 0.61<br>(0.35, 1.08) | 0.83<br>(0.63, 1.09)    |
| <b>2 weeks/ 6 weeks</b> | Primary  | 0.96<br>(0.77, 1.20) | 1.21<br>(1.03, 1.43)                                            | 0.99<br>(0.90, 1.10)    | 1.16<br>(1.03, 1.31)                | 1.19<br>(0.66, 2.13)    | 1.21<br>(1.03, 1.43)                                     | 1.05<br>(0.97, 1.13)                        | 0.83<br>(0.59, 1.15)               | 1.04<br>(0.68, 1.59)                    | 0.98<br>(0.61, 1.57) | 0.94<br>(0.74, 1.18)    |
|                         | Extended | 0.96<br>(0.77, 1.20) | 1.21<br>(1.02, 1.43)                                            | 1.00<br>(0.90, 1.10)    | 1.14<br>(1.01, 1.29)                | 1.22<br>(0.67, 2.22)    | 1.21<br>(1.02, 1.43)                                     | 1.04<br>(0.97, 1.13)                        | 0.85<br>(0.61, 1.19)               | 1.09<br>(0.71, 1.68)                    | 0.97<br>(0.60, 1.57) | 0.97<br>(0.76, 1.23)    |

**Table S5 – Characteristics of the Unweighted and Weighted Samples**

| Characteristics<br>mean (SD) or %  | Maintenance<br>(unweighted) | Bolus<br>(unweighted) | Maintenance<br>(weighted) | Bolus<br>(weighted) | Absolute Standardized<br>Difference (weighted) |
|------------------------------------|-----------------------------|-----------------------|---------------------------|---------------------|------------------------------------------------|
| Age, y                             | 61.4 (15.1)                 | 60.1 (15.3)           | 61.1 (15.2)               | 61.3 (15.1)         | 0.01                                           |
| Female                             | 45.1%                       | 45.8%                 | 45.3%                     | 46.7%               | 0.03                                           |
| Race: Black race (ref=White)       | 54.1%                       | 56.7%                 | 54.7%                     | 53.1%               | 0.03                                           |
| Other race (ref=White)             | 5.7%                        | 5.1%                  | 5.6%                      | 5.6%                | 0.00                                           |
| Vintage, y                         | 5.1 (5.0)                   | 4.8 (4.7)             | 5.0 (5.0)                 | 4.8 (4.)            | 0.04                                           |
| Body Mass Index                    | 33.9 (29.8)                 | 32.8 (23.5)           | 34.0 (29.7)               | 33.0 (24.0)         | 0.04                                           |
| Catheter Use                       | 19.5%                       | 21.6%                 | 20.1%                     | 20.9%               | 0.02                                           |
| Albumin at baseline                | 3.9 (0.4)                   | 3.8 (0.4)             | 3.9 (0.4)                 | 3.9 (0.4)           | 0.02                                           |
| Hemoglobin at baseline             | 12.0 (1.3)                  | 11.5 (1.4)            | 11.9 (1.3)                | 11.8 (1.3)          | 0.01                                           |
| Index TSAT                         | 31.4 (10.9)                 | 23.7 (9.5)            | 29.8 (10.9)               | 29.2 (11.8)         | 0.05                                           |
| Ferritin at baseline               | 745.5 (536.2)               | 624.6 (478.9)         | 723.3 (528.5)             | 723.1 (515.6)       | 0.00                                           |
| Iron (mg) at baseline              | 279.1 (214.3)               | 313.6 (315.7)         | 283.4 (233.4)             | 321.0 (272.7)       | 0.15                                           |
| EPO at baseline (1000U)            | 75.3 (78.3)                 | 110.9 (98.2)          | 83.5 (84.2)               | 86.1 (84.9)         | 0.04                                           |
| EPO during exposure (1000U)        | 73.1 (77.0)                 | 113.2 (100.4)         | 81.9 (84.3)               | 85.2 (84.4)         | 0.04                                           |
| Hospital days in last month        | 0.6 (1.9)                   | 1.0 (2.3)             | 0.7 (2.0)                 | 0.7 (2.0)           | 0.02                                           |
| Infection in last month            | 12.6%                       | 17.5%                 | 13.8%                     | 14.2%               | 0.01                                           |
| Infection in last 6 mos: Pneumonia | 12.8%                       | 16.7%                 | 13.8%                     | 14.3%               | 0.01                                           |
| Sepsis                             | 19.0%                       | 23.5%                 | 20.2%                     | 22.0%               | 0.04                                           |
| Vascular access                    | 10.1%                       | 15.0%                 | 11.3%                     | 11.7%               | 0.01                                           |
| Diabetes                           | 64.1%                       | 67.5%                 | 64.9%                     | 64.9%               | 0.00                                           |
| Ischemic stroke                    | 12.9%                       | 16.7%                 | 13.8%                     | 13.9%               | 0.00                                           |
| Myocardial Infarction              | 4.4%                        | 6.2%                  | 4.7%                      | 5.0%                | 0.01                                           |
| COPD, Asthma                       | 20.0%                       | 24.4%                 | 21.1%                     | 21.7%               | 0.01                                           |
| Cancer                             | 10.9%                       | 12.1%                 | 11.1%                     | 11.0%               | 0.00                                           |
| GI bleeding                        | 6.1%                        | 9.5%                  | 6.8%                      | 6.8%                | 0.00                                           |

**Table S6: Multivariable-Adjusted and IPTW<sup>1</sup>-Adjusted Associations Between Bolus Versus Maintenance (Referent) Dosing and Study Outcomes (N=48,050)**

| Outcome                                                                                  | Full Sample            |                      | Catheter Users         |                      |
|------------------------------------------------------------------------------------------|------------------------|----------------------|------------------------|----------------------|
|                                                                                          | Hazard Ratio (95% CI)  |                      | Hazard Ratio (95% CI)  |                      |
|                                                                                          | Multivariable-Adjusted | IPTW-Adjusted        | Multivariable-Adjusted | IPTW-Adjusted        |
| Death from any cause                                                                     | 0.92<br>(0.79, 1.06)   | 0.95<br>(0.80, 1.13) | 1.10<br>(0.85, 1.43)   | 0.96<br>(0.72, 1.27) |
| Hospitalized for pneumonia, sepsis, vascular access infection                            | 1.08<br>(0.96, 1.21)   | 1.05<br>(0.91, 1.21) | 1.19<br>(0.99, 1.44)   | 1.24<br>(1.00, 1.53) |
| Intravenous Antibiotic Use                                                               | 1.09<br>(1.01, 1.17)   | 1.10<br>(1.01, 1.20) | 1.08<br>(0.96, 1.22)   | 1.16<br>(0.99, 1.35) |
| Hospitalized for infection of any major organ system                                     | 1.13<br>(1.03, 1.24)   | 1.15<br>(1.03, 1.29) | 1.15<br>(0.98, 1.35)   | 1.18<br>(0.97, 1.43) |
| Infection-related death                                                                  | 1.17<br>(0.80, 1.71)   | 1.17<br>(0.77, 1.79) | 1.39<br>(0.74, 2.61)   | 1.02<br>(0.54, 1.91) |
| Hospitalized for pneumonia, vascular access infection, sepsis or infection-related death | 1.08<br>(0.96, 1.21)   | 1.05<br>(0.92, 1.21) | 1.20<br>(0.99, 1.44)   | 1.23<br>(1.00, 1.51) |
| Hospitalized for any infection or intravenous antibiotic use                             | 1.08<br>(1.02, 1.15)   | 1.08<br>(1.01, 1.17) | 1.07<br>(0.97, 1.19)   | 1.12<br>(0.98, 1.28) |
| Hospitalized for stroke                                                                  | 1.07<br>(0.77, 1.47)   | 1.09<br>(0.75, 1.59) | 1.30<br>(0.72, 2.35)   | 1.32<br>(0.71, 2.44) |
| Hospitalized for Myocardial Infarction                                                   | 0.95<br>(0.69, 1.32)   | 1.11<br>(0.75, 1.62) | 1.24<br>(0.66, 2.31)   | 1.40<br>(0.71, 2.77) |
| Cardiovascular-related death                                                             | 0.82<br>(0.66, 1.02)   | 0.78<br>(0.59, 1.02) | 1.14<br>(0.76, 1.73)   | 0.97<br>(0.60, 1.58) |
| Cardiovascular-related hospitalization or death                                          | 0.92<br>(0.78, 1.09)   | 0.95<br>(0.78, 1.16) | 1.28<br>(0.94, 1.73)   | 1.26<br>(0.90, 1.76) |

<sup>1</sup> inverse-probability of treatment weights
